# Supplementary material for: Glucagon-like peptide 1 and Glucagon-like peptide 2 in relation to osteoporosis in non-diabetic postmenopausal women
Source: PubMed Central journal article supplement (PMC6754449; doi:10.1038/s41598-019-50117-z), 2019-09-20
Supplement: 41598_2019_50117_MOESM1_ESM.pdf [file 41598_2019_50117_MOESM1_ESM.pdf]

**“Glucagon-like peptide 1 and Glucagon-like peptide 2 in relation to osteoporosis in non-diabetic postmenopausal women”**

María Cristina Montes Castillo. [cristinamontescastillo86@gmail.com](mailto:cristinamontescastillo86@gmail.com) <https://orcid.org/0000-0001-6375-5433>

María José Martínez Ramírez. [mjmartin@ujaen.es](mailto:mjmartin@ujaen.es) <https://orcid.org/0000-0001-6767-3881>

Rubén Soriano Arroyo. [soriano.granada@gmail.com](mailto:soriano.granada@gmail.com) <https://orcid.org/0000-0002-2910-1804>

Isabel Prieto Gomez. [iprieto@ujaen.es](mailto:iprieto@ujaen.es) <https://orcid.org/0000-0003-0624-9504>

Ana Belén Segarra Robles. [absegarra@ujaen.es](mailto:absegarra@ujaen.es) <https://orcid.org/0000-0002-9409-6052>

Macarena Garrido-Martínez. [maky\\_109@hotmail.com](mailto:maky_109@hotmail.com) <https://orcid.org/0000-0002-3190-8404>

Piedad Santiago-Fernández. [psantiagofernandez63@gmail.com](mailto:psantiagofernandez63@gmail.com) <https://orcid.org/0000-0001-6440-7174>

Miguel Delgado Rodríguez. [mdelgado@ujaen.es](mailto:mdelgado@ujaen.es) <https://orcid.org/0000-0002-3838-2548>

## **Supplementary material**

### **Nutritional composition of Resource HP/HC (NESTLE HEALTH SCIENCE)**

#### **1 package of 200 mL contains:**

- 1.6 Kilocalories/mL
- 320 kilocalories
- 20 g proteins (P)
- 32 g carbohydrates (CHO)
- 12.4 g lipids (L)
- Dietary fiber: 0 g
- Calorie distribution: P/CHO/L/F: 25/40/35/0
